# Supplementary material for: Carboxylic acid-tuned nickel(ii) clusters: syntheses, structures, solution behaviours and magnetic properties
Source: Royal Society of Chemistry journal article supplement (doi:10.1039/d1dt00165e), 2021-01-01
Supplement: d1dt00165e1.pdf [file d1dt00165e1.pdf]

## Supporting Information

### **Carboxylic acid tuned nickel(II) clusters: syntheses, structures, solution behaviours and magnetic properties**

Yan-Min Su,<sup>a</sup> Bao-Qian Ji,<sup>a</sup> Feng Shao,<sup>\*b</sup> Shan-Shan Zhang,<sup>a</sup> Marko Jagodič,<sup>c</sup>  
Zvonko Jagličić<sup>c,d</sup> Zhi-Yong Gao,<sup>e</sup> Jian-Min Dou,<sup>f</sup> and Di Sun<sup>\*a</sup>

<sup>a</sup>Key Laboratory of Colloid and Interface Chemistry, Ministry of Education, School of Chemistry and Chemical Engineering, State Key Laboratory of Crystal Materials, Shandong University, Ji'nan 250100, P. R. China. E-mail: dsun@sdu.edu.cn

<sup>b</sup>Key Laboratory of Marine Chemistry Theory and Technology, Ministry of Education, College of Chemistry and Chemical Engineering, Ocean University of China, Qingdao 266100, P. R. China. E-mail: feng.shao@ouc.edu.cn

<sup>c</sup>Institute of Mathematics, Physics and Mechanics, Jadranska 19, 1000 Ljubljana, Slovenia.

<sup>d</sup>Faculty of Civil and Geodetic Engineering, University of Ljubljana, Jamova 2, 1000 Ljubljana, Slovenia.

<sup>e</sup>School of Chemistry and Chemical Engineering, Collaborative Innovation Center of Henan Province for Green Manufacturing of Fine Chemicals, Key Laboratory of Green Chemical Media and Reactions, Ministry of Education, Henan Normal University, Henan Xinxiang 453007, P. R. China.

<sup>f</sup>Shandong Provincial Key Laboratory of Chemical Energy Storage and Novel Cell Technology, and School of Chemistry and Chemical Engineering, Liaocheng University, Liaocheng 252000, P. R. China.

**Table S1.** Crystal Data of **SD/Ni4a**, **SD/Ni5a** and **SD/Ni6b**.

| Identification code                         | <b>SD/Ni4a</b>                                                                  | <b>SD/Ni5a</b>                                                                                 | <b>SD/Ni6b</b>                                                                   |
|---------------------------------------------|---------------------------------------------------------------------------------|------------------------------------------------------------------------------------------------|----------------------------------------------------------------------------------|
| Empirical formula                           | C <sub>66</sub> H <sub>76</sub> N <sub>16</sub> Ni <sub>4</sub> O <sub>18</sub> | C <sub>62</sub> H <sub>72</sub> N <sub>10</sub> Ni <sub>5</sub> O <sub>20</sub> S <sub>6</sub> | C <sub>90</sub> H <sub>106</sub> N <sub>18</sub> Ni <sub>6</sub> O <sub>24</sub> |
| Formula weight                              | 1616.26                                                                         | 1763.20                                                                                        | 2176.18                                                                          |
| Crystal system                              | monoclinic                                                                      | triclinic                                                                                      | monoclinic                                                                       |
| Space group                                 | <i>P</i> 2 <sub>1</sub> / <i>n</i>                                              | <i>P</i> -1                                                                                    | <i>C</i> 2/ <i>c</i>                                                             |
| <i>a</i> / Å                                | 16.7045(4)                                                                      | 13.897(9)                                                                                      | 32.6272(4)                                                                       |
| <i>b</i> / Å                                | 25.3661(6)                                                                      | 14.250(9)                                                                                      | 13.8653(2)                                                                       |
| <i>c</i> / Å                                | 17.6478(3)                                                                      | 21.731(13)                                                                                     | 23.2676(3)                                                                       |
| <i>α</i> / °                                | 90                                                                              | 106.518(6)                                                                                     | 90                                                                               |
| <i>β</i> / °                                | 91.667(2)                                                                       | 95.516(6)                                                                                      | 108.7600(10)                                                                     |
| <i>γ</i> / °                                | 90                                                                              | 96.119(6)                                                                                      | 90                                                                               |
| Volume / Å <sup>3</sup>                     | 7474.7(3)                                                                       | 4066(4)                                                                                        | 9966.7(2)                                                                        |
| <i>Z</i>                                    | 4                                                                               | 2                                                                                              | 4                                                                                |
| ρ <sub>calc</sub> /cm <sup>3</sup>          | 1.436                                                                           | 1.440                                                                                          | 1.450                                                                            |
| μ/mm <sup>-1</sup>                          | 1.780                                                                           | 1.360                                                                                          | 1.892                                                                            |
| F(000)                                      | 3360.0                                                                          | 1820.0                                                                                         | 4528.0                                                                           |
| Radiation                                   | CuKα (λ = 1.54184)                                                              | MoKα (λ = 0.71073)                                                                             | CuKα (λ = 1.54184)                                                               |
| 2θ range for data collection / °            | 7.184–134.158                                                                   | 3.344–52.746                                                                                   | 6.988–134.154                                                                    |
| Index ranges                                | -19 ≤ <i>h</i> ≤ 19, -30 ≤ <i>k</i> ≤ 29, -20 ≤ <i>l</i> ≤ 20                   | -16 ≤ <i>h</i> ≤ 17, -17 ≤ <i>k</i> ≤ 17, -27 ≤ <i>l</i> ≤ 27                                  | -38 ≤ <i>h</i> ≤ 22, -14 ≤ <i>k</i> ≤ 16, -27 ≤ <i>l</i> ≤ 27                    |
| Independent reflections                     | 13102 [R <sub>int</sub> = 0.0684, R <sub>sigma</sub> = 0.0593]                  | 16589 [R <sub>int</sub> = 0.1548, R <sub>sigma</sub> = 0.2032]                                 | 8753 [R <sub>int</sub> = 0.0478, R <sub>sigma</sub> = 0.0486]                    |
| Goodness-of-fit on <i>F</i> <sup>2</sup>    | 1.172                                                                           | 0.921                                                                                          | 1.056                                                                            |
| Final R indexes [I ≥ 2σ (I)]                | R <sub>1</sub> = 0.0999<br>wR <sub>2</sub> = 0.2700                             | R <sub>1</sub> = 0.0702<br>wR <sub>2</sub> = 0.1634                                            | R <sub>1</sub> = 0.0438<br>wR <sub>2</sub> = 0.1160                              |
| Final R indexes [all data]                  | R <sub>1</sub> = 0.1225<br>wR <sub>2</sub> = 0.2942                             | R <sub>1</sub> = 0.1910<br>wR <sub>2</sub> = 0.2162                                            | R <sub>1</sub> = 0.0549<br>wR <sub>2</sub> = 0.1278                              |
| Largest diff. peak/hole / e Å <sup>-3</sup> | 1.44/-1.46                                                                      | 1.13/-0.63                                                                                     | 0.46/-0.61                                                                       |

**Table S2.** The selected bond lengths [ $\text{\AA}$ ] and angles [ $^\circ$ ] for **SD/Ni4a**, **SD/Ni5a** and **SD/Ni6b**.

| <b>SD/Ni4a</b> |             |             |             |
|----------------|-------------|-------------|-------------|
| Ni1—O2         | 2.043 (3)   | Ni3—O8      | 2.089 (4)   |
| Ni1—O5         | 2.123 (4)   | Ni3—O10     | 2.076 (3)   |
| Ni1—O6         | 2.029 (4)   | Ni3—O11     | 2.032 (4)   |
| Ni1—O7         | 2.060 (3)   | Ni3—O12     | 2.080 (5)   |
| Ni1—O9         | 2.108 (4)   | Ni3—N2      | 2.068 (18)  |
| Ni1—N11        | 2.075 (4)   | Ni4—O1      | 1.997 (3)   |
| Ni2—O3         | 2.009 (3)   | Ni4—O7      | 2.098 (3)   |
| Ni2—O7         | 2.056 (3)   | Ni4—O9      | 2.104 (4)   |
| Ni2—O8         | 2.116 (3)   | Ni4—O10     | 2.063 (3)   |
| Ni2—O10        | 2.091 (3)   | Ni4—N4      | 2.121 (5)   |
| Ni2—N7         | 2.078 (4)   | Ni4—N5      | 2.051 (4)   |
| Ni2—N9         | 2.078 (5)   | O4—Ni3—N2   | 86.0 (5)    |
| O2—Ni1—O5      | 89.83 (15)  | O10—Ni3—O8  | 82.04 (13)  |
| O2—Ni1—O7      | 92.01 (14)  | O10—Ni3—O12 | 79.85 (14)  |
| O2—Ni1—O9      | 89.06 (14)  | O11—Ni3—O4  | 174.40 (16) |
| O2—Ni1—N11     | 85.97 (16)  | O11—Ni3—O8  | 95.31 (16)  |
| O6—Ni1—O2      | 172.61 (15) | O11—Ni3—O10 | 93.56 (15)  |
| O6—Ni1—O5      | 89.06 (15)  | O11—Ni3—O12 | 89.00 (18)  |
| O6—Ni1—O7      | 94.97 (14)  | O11—Ni3—N2  | 89.3 (5)    |
| O6—Ni1—O9      | 94.34 (15)  | O12—Ni3—O8  | 161.60 (15) |
| O6—Ni1—N11     | 86.84 (16)  | N2—Ni3—O8   | 113.1 (5)   |
| O7—Ni1—O5      | 79.34 (13)  | N2—Ni3—O10  | 164.3 (5)   |
| O7—Ni1—O9      | 81.89 (13)  | N2—Ni3—O12  | 84.7 (5)    |
| O7—Ni1—N11     | 173.79 (17) | O1—Ni4—O7   | 92.46 (14)  |
| O9—Ni1—O5      | 161.15 (14) | O1—Ni4—O9   | 89.80 (14)  |
| N11—Ni1—O5     | 94.77 (17)  | O1—Ni4—O10  | 170.33 (15) |
| N11—Ni1—O9     | 103.92 (17) | O1—Ni4—N4   | 99.36 (15)  |
| O3—Ni2—O7      | 169.04 (15) | O1—Ni4—N5   | 94.63 (15)  |
| O3—Ni2—O8      | 90.23 (14)  | O7—Ni4—O9   | 81.10 (14)  |
| O3—Ni2—O10     | 93.05 (14)  | O7—Ni4—N4   | 165.27 (15) |
| O3—Ni2—N7      | 92.84 (14)  | O9—Ni4—N4   | 90.13 (16)  |
| O3—Ni2—N9      | 98.38 (16)  | O10—Ni4—O7  | 80.64 (13)  |
| O7—Ni2—O8      | 97.84 (13)  | O7—Ni2—N9   | 89.21 (14)  |
| O7—Ni2—O10     | 80.97 (13)  | O10—Ni2—O8  | 81.02 (15)  |
| O7—Ni2—N7      | 79.24 (13)  | N7—Ni2—O8   | 176.81 (14) |
| N7—Ni2—O10     | 99.69 (15)  | O10—Ni4—O9  | 95.76 (13)  |
| N9—Ni2—O8      | 89.00 (16)  | O10—Ni4—N4  | 88.55 (14)  |
| N9—Ni2—O10     | 164.86 (15) | N5—Ni4—O7   | 100.09 (15) |
| N9—Ni2—N7      | 89.68 (16)  | N5—Ni4—O9   | 175.35 (14) |
| O4—Ni3—O8      | 89.36 (15)  | N5—Ni4—O10  | 80.06 (14)  |
| O4—Ni3—O10     | 90.14 (14)  | N5—Ni4—N4   | 87.76 (17)  |
| O4—Ni3—O12     | 87.52 (16)  |             |             |
| <b>SD/Ni5a</b> |             |             |             |

|                |             |             |             |
|----------------|-------------|-------------|-------------|
| Ni1—O1         | 2.024 (5)   | Ni3—O9      | 1.990 (6)   |
| Ni1—O2         | 2.099 (5)   | Ni3—N4      | 2.090 (7)   |
| Ni1—O7         | 2.069 (5)   | Ni3—N5      | 2.070 (7)   |
| Ni1—O13        | 2.015 (5)   | Ni4—O2      | 2.047 (5)   |
| Ni1—N2         | 2.077 (6)   | Ni4—O7      | 2.066 (5)   |
| Ni1—N7         | 2.083 (6)   | Ni4—O8      | 2.026 (5)   |
| Ni2—O1         | 2.038 (5)   | Ni4—O10     | 1.993 (6)   |
| Ni2—O3         | 2.103 (5)   | Ni4—O11     | 2.096 (5)   |
| Ni2—O4         | 2.010 (5)   | Ni4—O16     | 2.018 (5)   |
| Ni2—O5         | 2.090 (5)   | Ni5—O4      | 2.025 (5)   |
| Ni2—O6         | 2.043 (5)   | Ni5—O14     | 2.016 (5)   |
| Ni2—O12        | 1.991 (5)   | Ni5—O15     | 2.089 (7)   |
| Ni3—O1         | 2.077 (5)   | Ni5—O17     | 2.044 (6)   |
| Ni3—O2         | 2.014 (5)   | Ni5—O20     | 2.072 (7)   |
| Ni3—O3         | 2.077 (5)   | Ni5—N10     | 2.064 (8)   |
| O1—Ni1—O2      | 79.68 (19)  | O9—Ni3—O2   | 170.4 (2)   |
| O1—Ni1—O7      | 97.17 (19)  | O9—Ni3—O3   | 90.7 (2)    |
| O1—Ni1—N2      | 79.2 (2)    | O9—Ni3—N4   | 97.9 (3)    |
| O1—Ni1—N7      | 90.1 (2)    | O9—Ni3—N5   | 94.9 (3)    |
| O7—Ni1—O2      | 79.18 (19)  | N5—Ni3—O1   | 98.7 (2)    |
| O7—Ni1—N2      | 175.8 (2)   | N5—Ni3—O3   | 174.1 (3)   |
| O7—Ni1—N7      | 92.4 (2)    | N5—Ni3—N4   | 88.4 (3)    |
| O13—Ni1—O1     | 166.5 (2)   | O2—Ni4—O7   | 80.45 (18)  |
| O13—Ni1—O2     | 90.7 (2)    | O2—Ni4—O11  | 79.44 (19)  |
| O13—Ni1—O7     | 90.2 (2)    | O7—Ni4—O11  | 159.77 (19) |
| O13—Ni1—N2     | 93.8 (2)    | O8—Ni4—O2   | 98.8 (2)    |
| O13—Ni1—N7     | 100.9 (2)   | O8—Ni4—O7   | 91.9 (2)    |
| N2—Ni1—O2      | 102.0 (2)   | O8—Ni4—O11  | 93.3 (2)    |
| N2—Ni1—N7      | 85.6 (2)    | O10—Ni4—O2  | 91.3 (2)    |
| N7—Ni1—O2      | 165.7 (2)   | O10—Ni4—O7  | 89.1 (2)    |
| O1—Ni2—O3      | 79.66 (18)  | O10—Ni4—O8  | 169.9 (2)   |
| O1—Ni2—O5      | 98.54 (19)  | O10—Ni4—O11 | 89.2 (2)    |
| O1—Ni2—O6      | 91.0 (2)    | O10—Ni4—O16 | 83.1 (2)    |
| O4—Ni2—O1      | 82.27 (19)  | O16—Ni4—O2  | 170.9 (2)   |
| O4—Ni2—O3      | 161.93 (19) | O16—Ni4—O7  | 106.6 (2)   |
| O4—Ni2—O5      | 89.31 (19)  | O16—Ni4—O8  | 86.9 (2)    |
| O4—Ni2—O6      | 94.6 (2)    | O16—Ni4—O11 | 93.2 (2)    |
| O5—Ni2—O3      | 93.38 (19)  | O4—Ni5—O15  | 90.6 (2)    |
| O6—Ni2—O3      | 85.7 (2)    | O4—Ni5—O17  | 97.1 (2)    |
| O6—Ni2—O5      | 170.1 (2)   | O4—Ni5—O20  | 176.2 (2)   |
| O12—Ni2—O1     | 177.2 (2)   | O4—Ni5—N10  | 88.3 (3)    |
| O12—Ni2—O3     | 98.0 (2)    | O14—Ni5—O4  | 91.5 (2)    |
| O12—Ni2—O4     | 100.1 (2)   | O14—Ni5—O15 | 91.9 (3)    |
| O12—Ni2—O5     | 83.1 (2)    | O14—Ni5—O17 | 170.9 (2)   |
| O12—Ni2—O6     | 87.3 (2)    | O14—Ni5—O20 | 84.8 (2)    |
| O1—Ni3—N4      | 166.6 (2)   | O14—Ni5—N10 | 84.4 (3)    |
| O2—Ni3—O1      | 80.44 (18)  | O17—Ni5—O15 | 91.0 (3)    |
| O2—Ni3—O3      | 94.81 (18)  | O17—Ni5—O20 | 86.6 (2)    |
| O2—Ni3—N4      | 89.7 (3)    | O17—Ni5—N10 | 92.9 (3)    |
| O2—Ni3—N5      | 79.4 (2)    | O20—Ni5—O15 | 88.4 (3)    |
| O3—Ni3—O1      | 79.38 (18)  | N10—Ni5—O15 | 176.1 (3)   |
| O3—Ni3—N4      | 92.5 (2)    | N10—Ni5—O20 | 92.4 (3)    |
| O9—Ni3—O1      | 92.9 (2)    |             |             |
| <b>SD/Ni6b</b> |             |             |             |

|                                        |             |                         |             |
|----------------------------------------|-------------|-------------------------|-------------|
| Ni1—O4                                 | 2.0964 (17) | Ni3—O11                 | 1.9934 (17) |
| Ni1—O10                                | 2.0441 (16) | Ni3—O7                  | 2.161 (2)   |
| Ni1—O10 <sup>i</sup>                   | 2.0897 (17) | Ni3—O1W                 | 2.065 (2)   |
| Ni1—O5                                 | 2.0246 (17) | Ni3—O1                  | 1.995 (2)   |
| Ni1—N5                                 | 2.097 (2)   | Ni3—O9                  | 2.137 (2)   |
| Ni1—N1                                 | 2.098 (2)   | Ni3—N4                  | 2.062 (2)   |
| Ni2—O4 <sup>i</sup>                    | 2.1118 (17) | O4—Ni2 <sup>i</sup>     | 2.1119 (17) |
| Ni2—O10                                | 2.0520 (17) | Ni2—O6 <sup>i</sup>     | 2.0747 (17) |
| Ni2—O11                                | 2.0259 (17) | O10—Ni1 <sup>i</sup>    | 2.0899 (17) |
| Ni2—O3                                 | 2.0571 (17) | Ni2—O2                  | 2.0083 (18) |
| O4—Ni1—N5                              | 92.27 (7)   | O3—Ni2—O4 <sup>i</sup>  | 92.40 (7)   |
| O4—Ni1—N1                              | 174.98 (8)  | O3—Ni2—O6 <sup>i</sup>  | 173.53 (7)  |
| O10—Ni1—O4                             | 96.68 (6)   | O2—Ni2—O4 <sup>i</sup>  | 98.83 (7)   |
| O10 <sup>i</sup> —Ni1—O4               | 79.07 (6)   | O2—Ni2—O10              | 174.69 (7)  |
| O10—Ni1—O10 <sup>i</sup>               | 81.06 (7)   | O2—Ni2—O11              | 100.15 (7)  |
| O10 <sup>i</sup> —Ni1—N5               | 166.45 (8)  | O2—Ni2—O6 <sup>i</sup>  | 86.08 (7)   |
| O10—Ni1—N5                             | 89.72 (7)   | O2—Ni2—O3               | 87.58 (7)   |
| O10—Ni1—N1                             | 78.32 (7)   | O11—Ni3—O7              | 104.63 (8)  |
| O10 <sup>i</sup> —Ni1—N1               | 99.55 (8)   | O11—Ni3—O1W             | 88.14 (8)   |
| O5—Ni1—O4                              | 90.04 (7)   | O11—Ni3—O1              | 98.26 (8)   |
| O5—Ni1—O10 <sup>i</sup>                | 93.13 (7)   | O11—Ni3—O9              | 163.33 (9)  |
| O5—Ni1—O10                             | 170.08 (7)  | O11—Ni3—N4              | 89.03 (8)   |
| O5—Ni1—N5                              | 97.31 (8)   | O1W—Ni3—O7              | 85.09 (9)   |
| O5—Ni1—N1                              | 94.86 (8)   | O1W—Ni3—O9              | 83.80 (9)   |
| N5—Ni1—N1                              | 88.18 (9)   | O1—Ni3—O7               | 156.88 (9)  |
| O10—Ni2—O4 <sup>i</sup>                | 79.56 (6)   | O1—Ni3—O1W              | 92.56 (10)  |
| O10—Ni2—O6 <sup>i</sup>                | 88.78 (7)   | O1—Ni3—O9               | 96.66 (9)   |
| O10—Ni2—O3                             | 97.52 (7)   | O1—Ni3—N4               | 90.57 (10)  |
| O11—Ni2—O4 <sup>i</sup>                | 160.95 (7)  | O9—Ni3—O7               | 60.23 (9)   |
| O11—Ni2—O10                            | 81.39 (7)   | N4—Ni3—O7               | 92.97 (9)   |
| O11—Ni2—O6 <sup>i</sup>                | 92.36 (7)   | N4—Ni3—O1W              | 176.05 (11) |
| O11—Ni2—O3                             | 90.03 (7)   | N4—Ni3—O9               | 98.24 (9)   |
| O6 <sup>i</sup> —Ni2—O4 <sup>i</sup>   | 87.30 (7)   | Ni1—O4—Ni2 <sup>i</sup> | 96.47 (7)   |
| Symmetry code: (i) $-x+1, y, -z+1/2$ . |             |                         |             |

**Table S3.** The shortest intra- and intermolecular Ni-Ni distances [ $\text{\AA}$ ] for **SD/Ni4a**, **SD/Ni5a** and **SD/Ni6b**.

| Intramolecular Ni-Ni distances       |            |                      |            |
|--------------------------------------|------------|----------------------|------------|
| <b>SD/Ni4a</b>                       |            |                      |            |
| Ni1-Ni2                              | 3.5796(10) | Ni2-Ni4              | 3.1576(11) |
| Ni1-Ni4                              | 3.0892(11) | Ni3-Ni4              | 3.6293(11) |
| Ni2-Ni3                              | 3.0910(12) |                      |            |
| <b>SD/Ni5a</b>                       |            |                      |            |
| Ni1-Ni2                              | 3.4928(18) | Ni2-Ni3              | 3.1077(23) |
| Ni1-Ni3                              | 3.1424(20) | Ni2-Ni3              | 3.4844(21) |
| Ni1-Ni4                              | 3.0997(22) | Ni3-Ni4              | 3.5298(25) |
| <b>SD/Ni6b</b>                       |            |                      |            |
| Ni1-Ni1 <sup>i</sup>                 | 3.1403(8)  | Ni1-Ni2 <sup>i</sup> | 3.1391(8)  |
| Ni1-Ni2                              | 3.5290(6)  | Ni2-Ni3              | 3.4785(9)  |
| Symmetry code: (i) $-x+1, y, -z+1/2$ |            |                      |            |
| Intermolecular Ni-Ni distances       |            |                      |            |
| <b>SD/Ni4a</b>                       |            | 9.8558(11)           |            |
| <b>SD/Ni5a</b>                       |            | 9.2197(49)           |            |
| <b>SD/Ni6b</b>                       |            | 6.5294(6)            |            |

**Table S4.** Identification of the key species in ESI-MS of **SD/Ni6b (1a-1j)**, **SD/Ni5a (2a-2g)** and **SD/Ni4a (3a-3j)**.

| Species   | Molecular formula                                                                                                                                                                   | Exp. <i>m/z</i> | Sim. <i>m/z</i> |
|-----------|-------------------------------------------------------------------------------------------------------------------------------------------------------------------------------------|-----------------|-----------------|
| <b>1a</b> | [Ni <sub>4</sub> (bdped)(mba) <sub>5</sub> (Hdmpz) <sub>2</sub> (H <sub>2</sub> O)] <sup>+</sup>                                                                                    | 1367.2382       | 1367.2363       |
| <b>1b</b> | [Ni <sub>5</sub> (bdped)(mba) <sub>7</sub> (CH <sub>3</sub> CN)] <sup>+</sup>                                                                                                       | 1528.1329       | 1528.1366       |
| <b>1c</b> | [Ni <sub>5</sub> (bdped) <sub>3</sub> (mba) <sub>2</sub> (NO <sub>3</sub> )(Hdmpz)(C <sub>2</sub> H <sub>6</sub> O) <sub>2</sub> (CH <sub>3</sub> OH)] <sup>+</sup>                 | 1590.2555       | 1590.3078       |
| <b>1d</b> | [Ni <sub>5</sub> (bdped)(mba) <sub>7</sub> (Hdmpz)(CH <sub>3</sub> CN)] <sup>+</sup>                                                                                                | 1624.2021       | 1624.2057       |
| <b>1e</b> | [Ni <sub>5</sub> (bdped) <sub>2</sub> (mba) <sub>5</sub> (Hdmpz)(CH <sub>3</sub> OH) <sub>2</sub> (H <sub>2</sub> O) <sub>2</sub> ] <sup>+</sup>                                    | 1661.3074       | 1661.2907       |
| <b>1f</b> | [Ni <sub>5</sub> (bdped) <sub>3</sub> (mba) <sub>2</sub> (NO <sub>3</sub> )(Hdmpz) <sub>2</sub> (C <sub>2</sub> H <sub>6</sub> O) <sub>2</sub> (CH <sub>3</sub> OH)] <sup>+</sup>   | 1686.3128       | 1686.3768       |
| <b>1g</b> | [Ni <sub>5</sub> (bdped)(mba) <sub>7</sub> (Hdmpz)(CH <sub>3</sub> CN) <sub>2</sub> (CH <sub>3</sub> OH)] <sup>+</sup>                                                              | 1697.2587       | 1697.2586       |
| <b>1h</b> | [Ni <sub>5</sub> (bdped)(mba) <sub>7</sub> (Hdmpz) <sub>2</sub> (CH <sub>3</sub> CN)] <sup>+</sup>                                                                                  | 1720.2701       | 1720.2747       |
| <b>1i</b> | [Ni <sub>5</sub> (bdped)(mba) <sub>7</sub> (Hdmpz) <sub>2</sub> (CH <sub>3</sub> CN) <sub>2</sub> (CH <sub>3</sub> OH)] <sup>+</sup>                                                | 1793.3267       | 1793.3277       |
| <b>1j</b> | [Ni <sub>5</sub> (bdped) <sub>3</sub> (mba) <sub>3</sub> (Hdmpz) <sub>4</sub> (C <sub>2</sub> H <sub>6</sub> O)(CH <sub>3</sub> OH)] <sup>+</sup>                                   | 1905.4735       | 1905.5302       |
| <b>2a</b> | [Ni <sub>5</sub> (bdped)(tca) <sub>6</sub> (Hdmpz) <sub>3</sub> (C <sub>2</sub> H <sub>6</sub> O) <sub>4</sub> (CH <sub>3</sub> OH)] <sup>2+</sup>                                  | 904.0306        | 904.0546        |
| <b>2b</b> | [Ni <sub>5</sub> (bdped)(tca) <sub>6</sub> (Hdmpz) <sub>4</sub> (C <sub>2</sub> H <sub>6</sub> O) <sub>4</sub> (CH <sub>3</sub> OH)] <sup>2+</sup>                                  | 952.0665        | 952.0890        |
| <b>2c</b> | [Ni <sub>5</sub> (bdped) <sub>2</sub> (tca) <sub>4</sub> (Hdmpz) <sub>6</sub> (CH <sub>3</sub> OH)(H <sub>2</sub> O) <sub>7</sub> ] <sup>2+</sup>                                   | 1016.1877       | 1016.1895       |
| <b>2d</b> | [Ni <sub>4</sub> (bdped) <sub>2</sub> (tca) <sub>3</sub> ] <sup>+</sup>                                                                                                             | 1110.9372       | 1110.9478       |
| <b>2e</b> | [Ni <sub>5</sub> (bdped) <sub>3</sub> (tca) <sub>2</sub> (Hdmpz) <sub>8</sub> (CH <sub>3</sub> OH) <sub>2</sub> (CH <sub>3</sub> CN)(H <sub>2</sub> O) <sub>5</sub> ] <sup>2+</sup> | 1127.8991       | 1127.8528       |
| <b>2f</b> | [Ni <sub>4</sub> (bdped)(tca) <sub>4</sub> (OH)(CH <sub>3</sub> OH) <sub>2</sub> (H <sub>2</sub> O) <sub>4</sub> ] <sup>+</sup>                                                     | 1142.8617       | 1142.9032       |
| <b>2g</b> | [Ni <sub>4</sub> (bdped)(tca) <sub>5</sub> (CH <sub>3</sub> OH)(H <sub>2</sub> O) <sub>5</sub> ] <sup>+</sup>                                                                       | 1238.9307       | 1238.8730       |
| <b>3a</b> | [Ni <sub>4</sub> (bdped) <sub>2</sub> (ba)(NO <sub>3</sub> ) <sub>2</sub> (H <sub>2</sub> O) <sub>3</sub> (CH <sub>3</sub> OH)] <sup>+</sup>                                        | 1061.0654       | 1061.0540       |
| <b>3b</b> | [Ni <sub>4</sub> (bdped) <sub>2</sub> (ba) <sub>3</sub> ] <sup>+</sup>                                                                                                              | 1093.0701       | 1093.0787       |
| <b>3c</b> | [Ni <sub>4</sub> (bdped)(ba) <sub>5</sub> (CH <sub>3</sub> OH)] <sup>+</sup>                                                                                                        | 1119.0390       | 1119.0356       |
| <b>3d</b> | [Ni <sub>4</sub> (bdped)(ba) <sub>5</sub> (Hdmpz)(CH <sub>3</sub> OH)] <sup>+</sup>                                                                                                 | 1215.1079       | 1215.1046       |
| <b>3e</b> | [Ni <sub>4</sub> (ba) <sub>5</sub> (NO <sub>3</sub> ) <sub>2</sub> (Hdmpz) <sub>3</sub> (H <sub>2</sub> O) <sub>3</sub> (CH <sub>3</sub> OH)] <sup>+</sup>                          | 1337.1456       | 1337.1221       |
| <b>3f</b> | [Ni <sub>4</sub> (bdped) <sub>2</sub> (ba) <sub>3</sub> (Hdmpz) <sub>2</sub> (CH <sub>3</sub> OH) <sub>2</sub> ] <sup>+</sup>                                                       | 1349.3141       | 1349.2691       |
| <b>3g</b> | [Ni <sub>4</sub> (bdped) <sub>3</sub> (ba)(Hdmpz) <sub>2</sub> (H <sub>2</sub> O) <sub>3</sub> (CH <sub>3</sub> OH)] <sup>+</sup>                                                   | 1377.3425       | 1377.3439       |
| <b>3h</b> | [Ni <sub>4</sub> Na <sub>2</sub> (ba) <sub>8</sub> (NO <sub>3</sub> )(Hdmpz)(CH <sub>3</sub> OH)(H <sub>2</sub> O)] <sup>+</sup>                                                    | 1456.0676       | 1456.0424       |
| <b>3i</b> | [Ni <sub>4</sub> (bdped)(ba) <sub>5</sub> (Hdmpz) <sub>4</sub> ] <sup>+</sup>                                                                                                       | 1471.3570       | 1471.2852       |
| <b>3j</b> | [Ni <sub>4</sub> (bdped) <sub>2</sub> (ba)(NO <sub>3</sub> ) <sub>2</sub> (Hdmpz) <sub>5</sub> (CH <sub>3</sub> CN)] <sup>+</sup>                                                   | 1496.3850       | 1496.3673       |

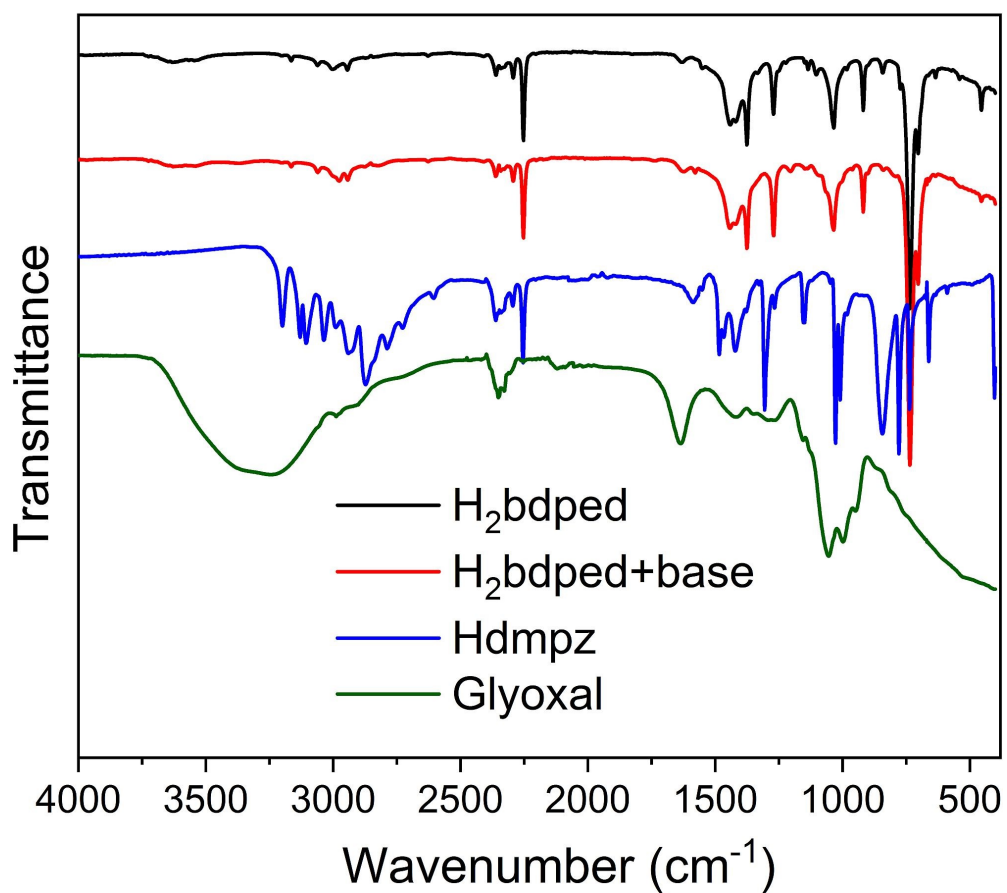

**Figure S1.** The IR spectra of pure organic ligands in MeCN/DCM.



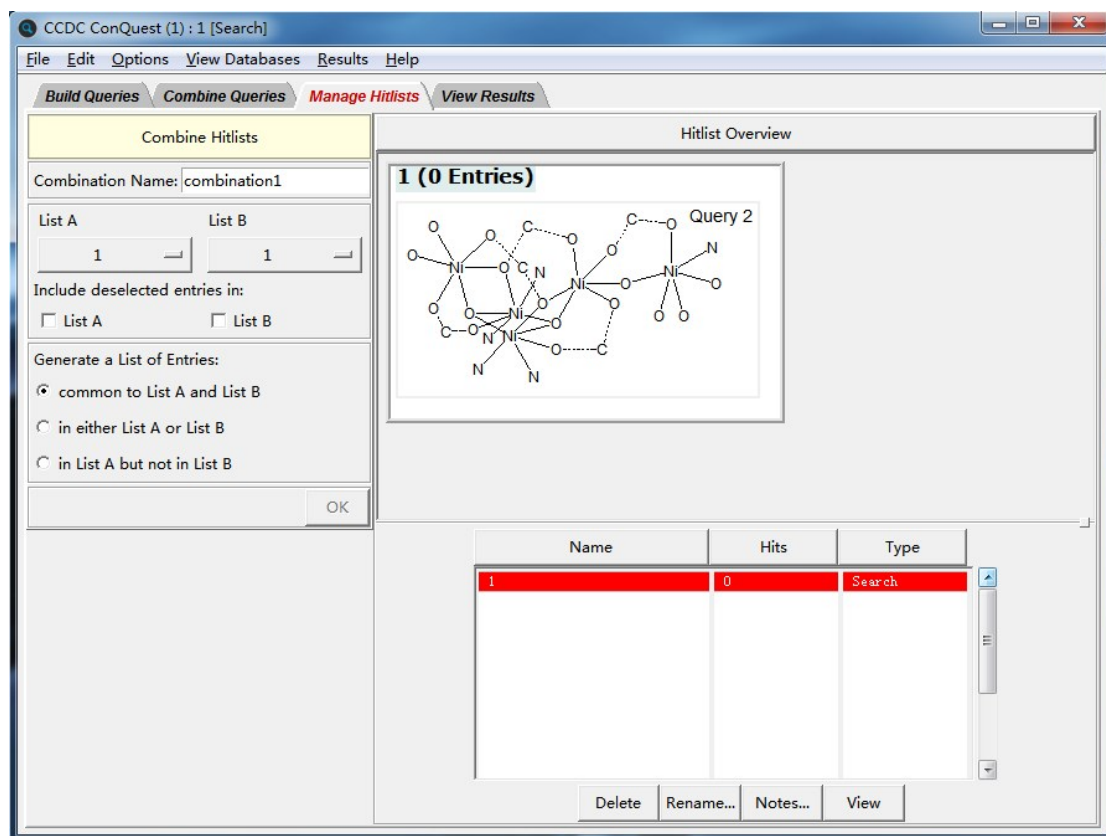

**Figure S2.** The scheme about searching the topology of Ni<sub>5</sub> core geometry (five nickel(II) ions with bridged parts of ligands including bridging carboxylates) in Cambridge Structural Database (version 2020.3.0).

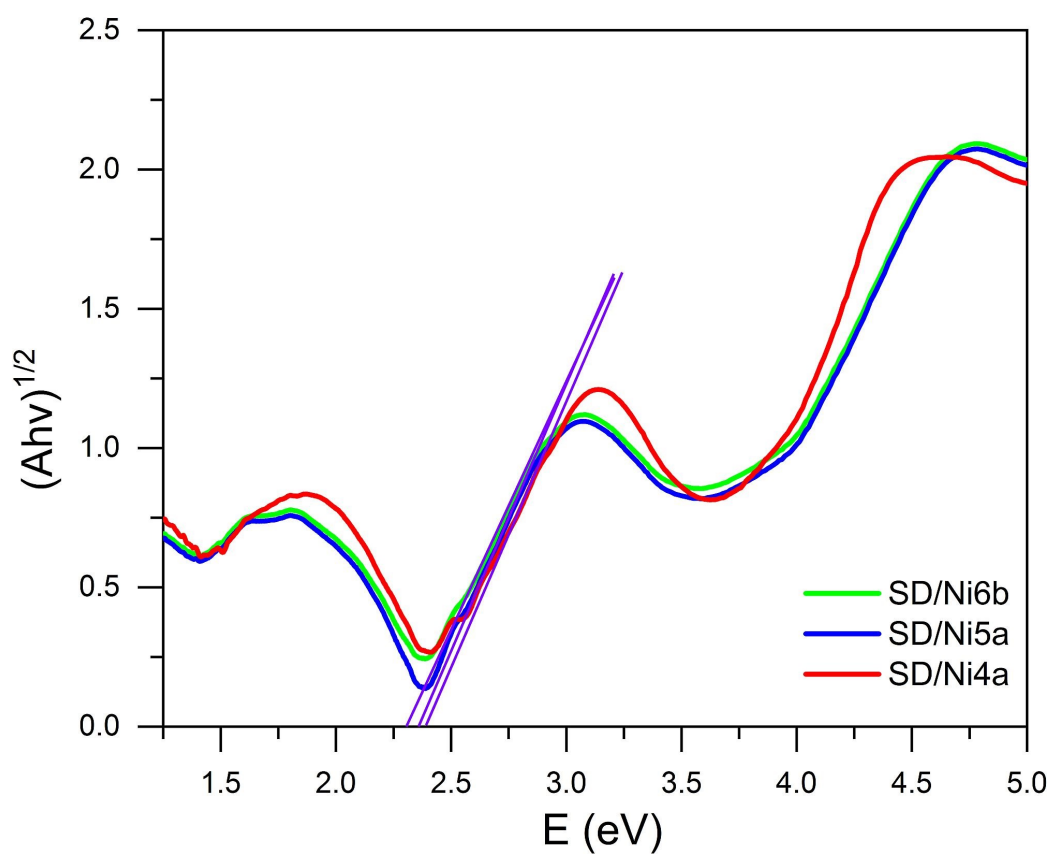

**Figure S3.** The absorption spectra of **SD/Ni4a**, **SD/Ni5a** and **SD/Ni6b** derived from the diffuse reflectance spectra through the Kubelka-Munk function.

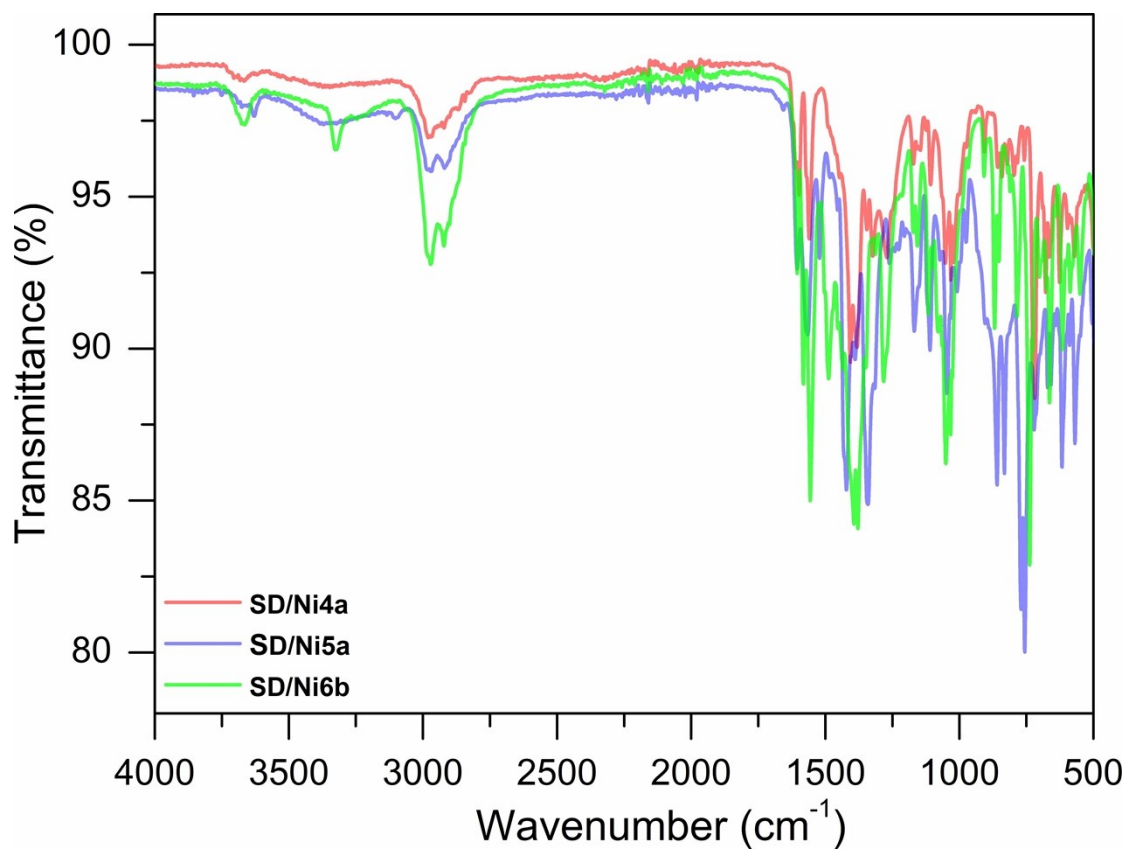

**Figure S4.** The IR spectra of SD/Ni4a, SD/Ni5a and SD/Ni6b.

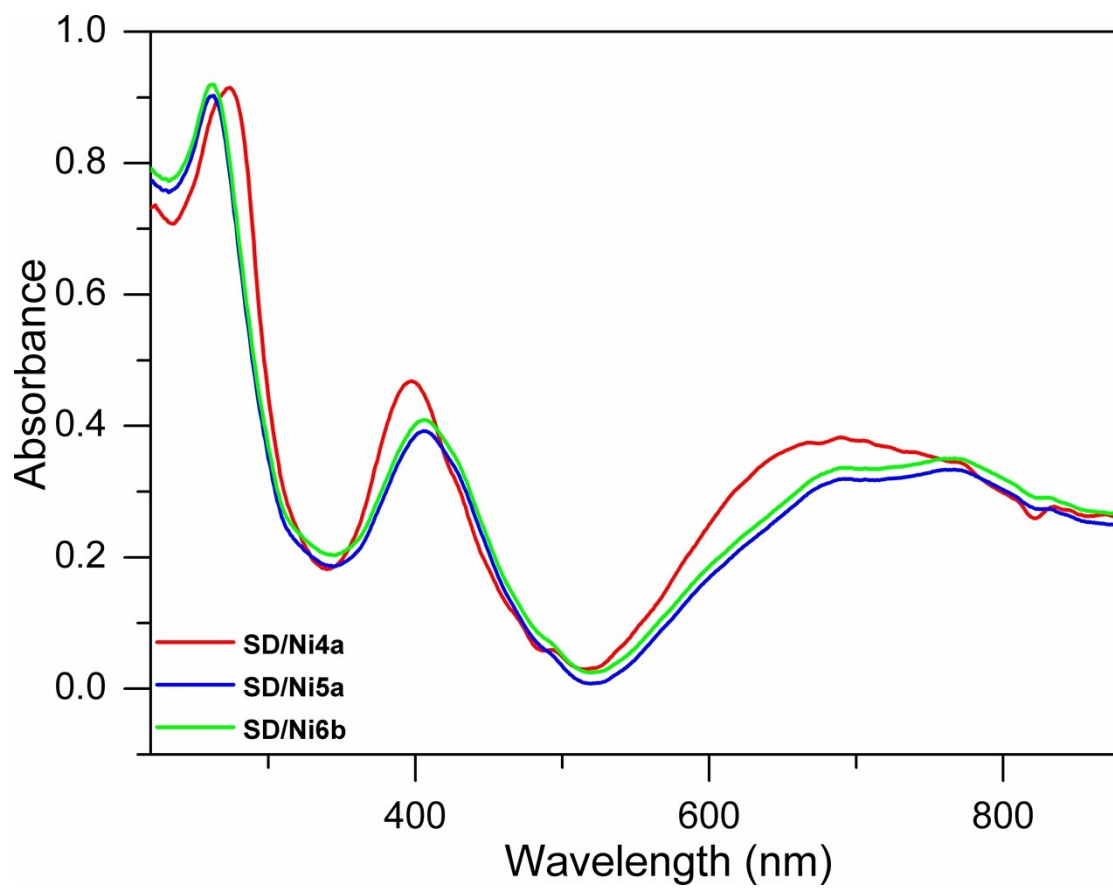

**Figure S5.** The solid-state UV-Vis spectra of **SD/Ni4a**, **SD/Ni5a** and **SD/Ni6b**.

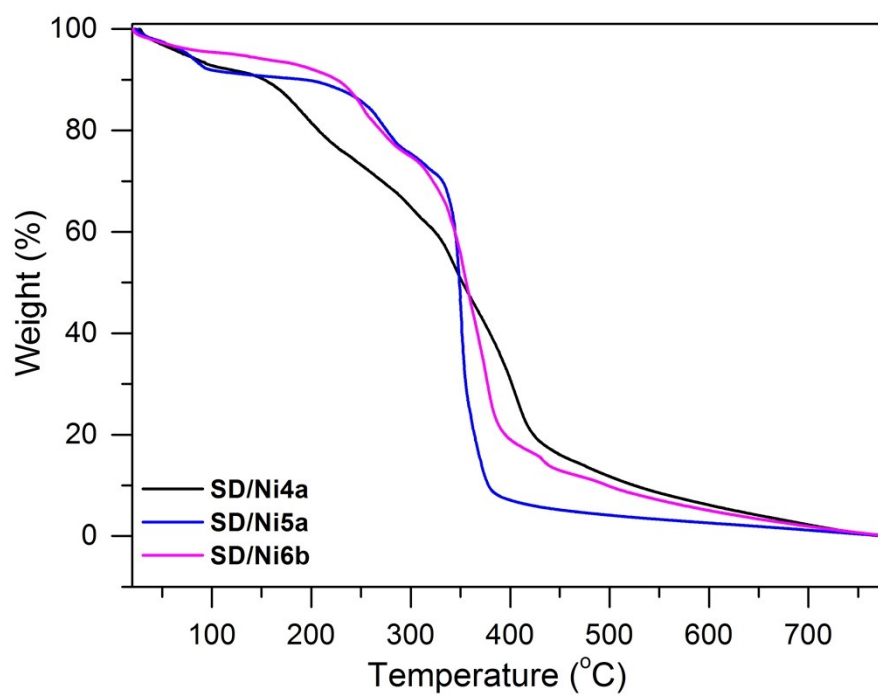

**Figure S6.** The TGA of SD/Ni4a, SD/Ni5a and SD/Ni6b.

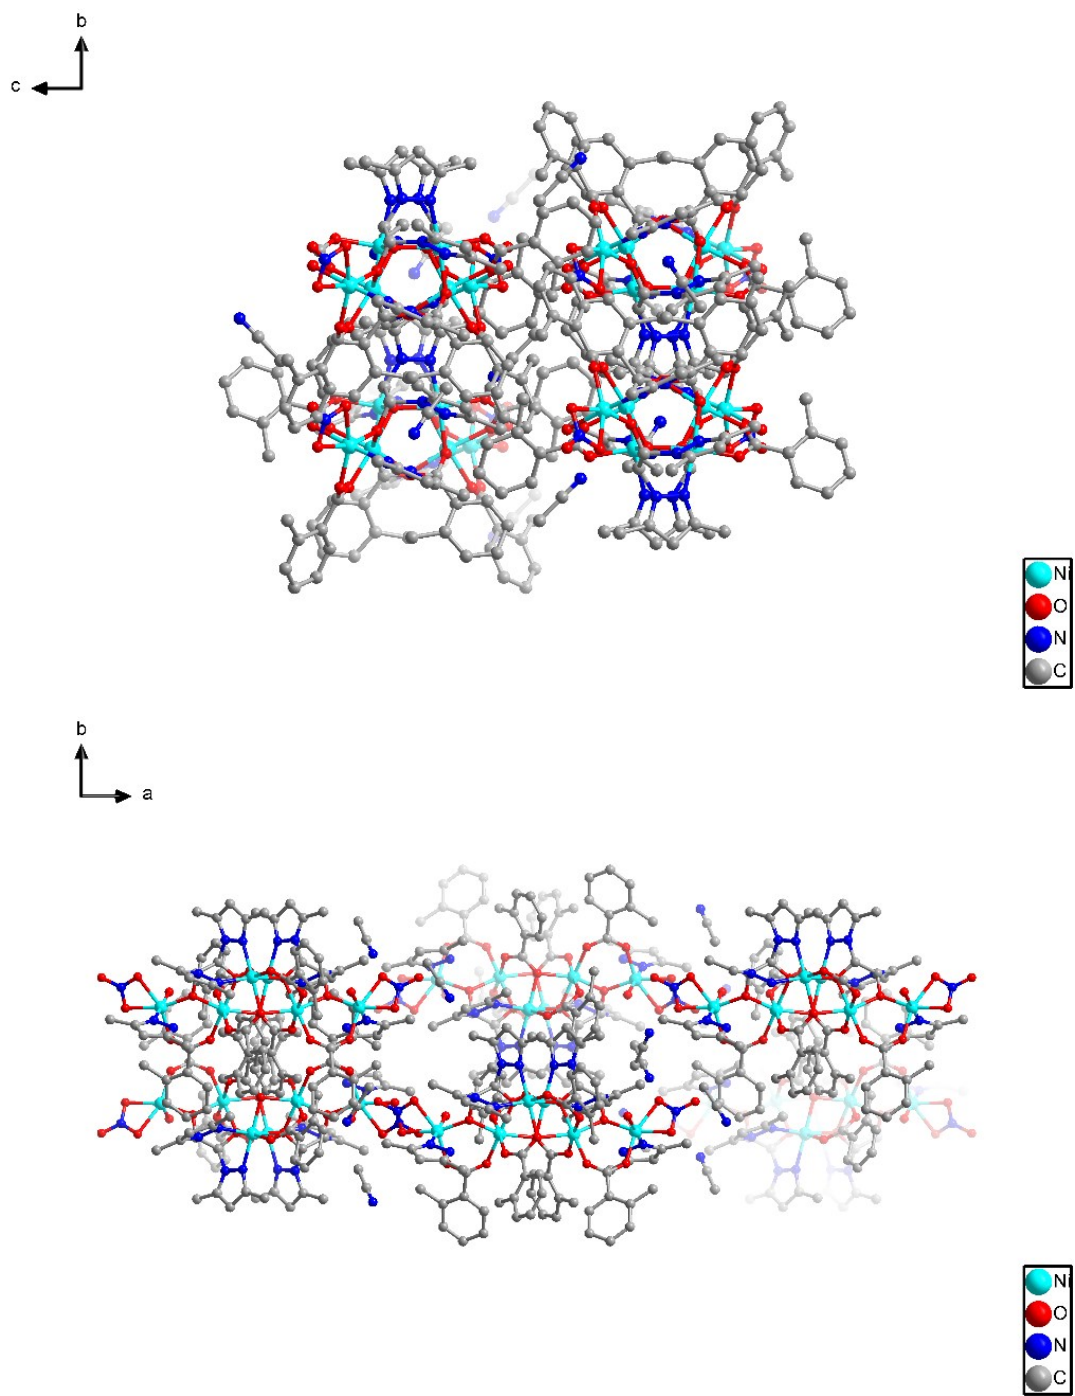

**Figure S7.** The cluster packing in the unit cell of **SD/Ni6b** viewed along two different directions.

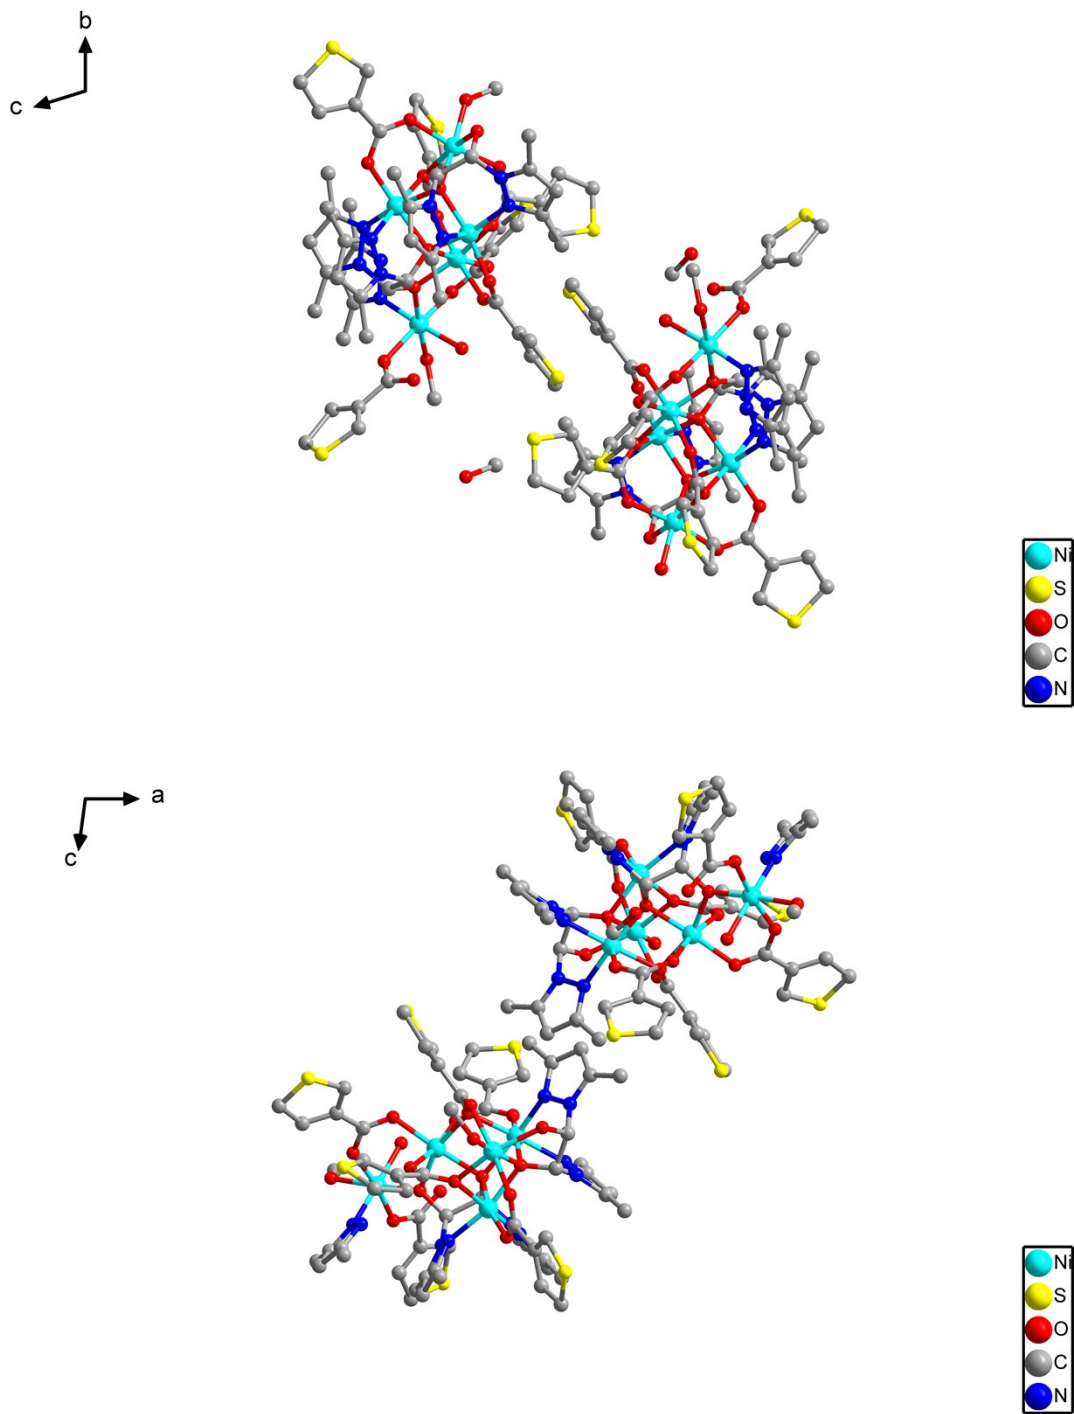

**Figure S8.** The cluster packing in the unit cell of **SD/Ni5a** viewed along two different directions.

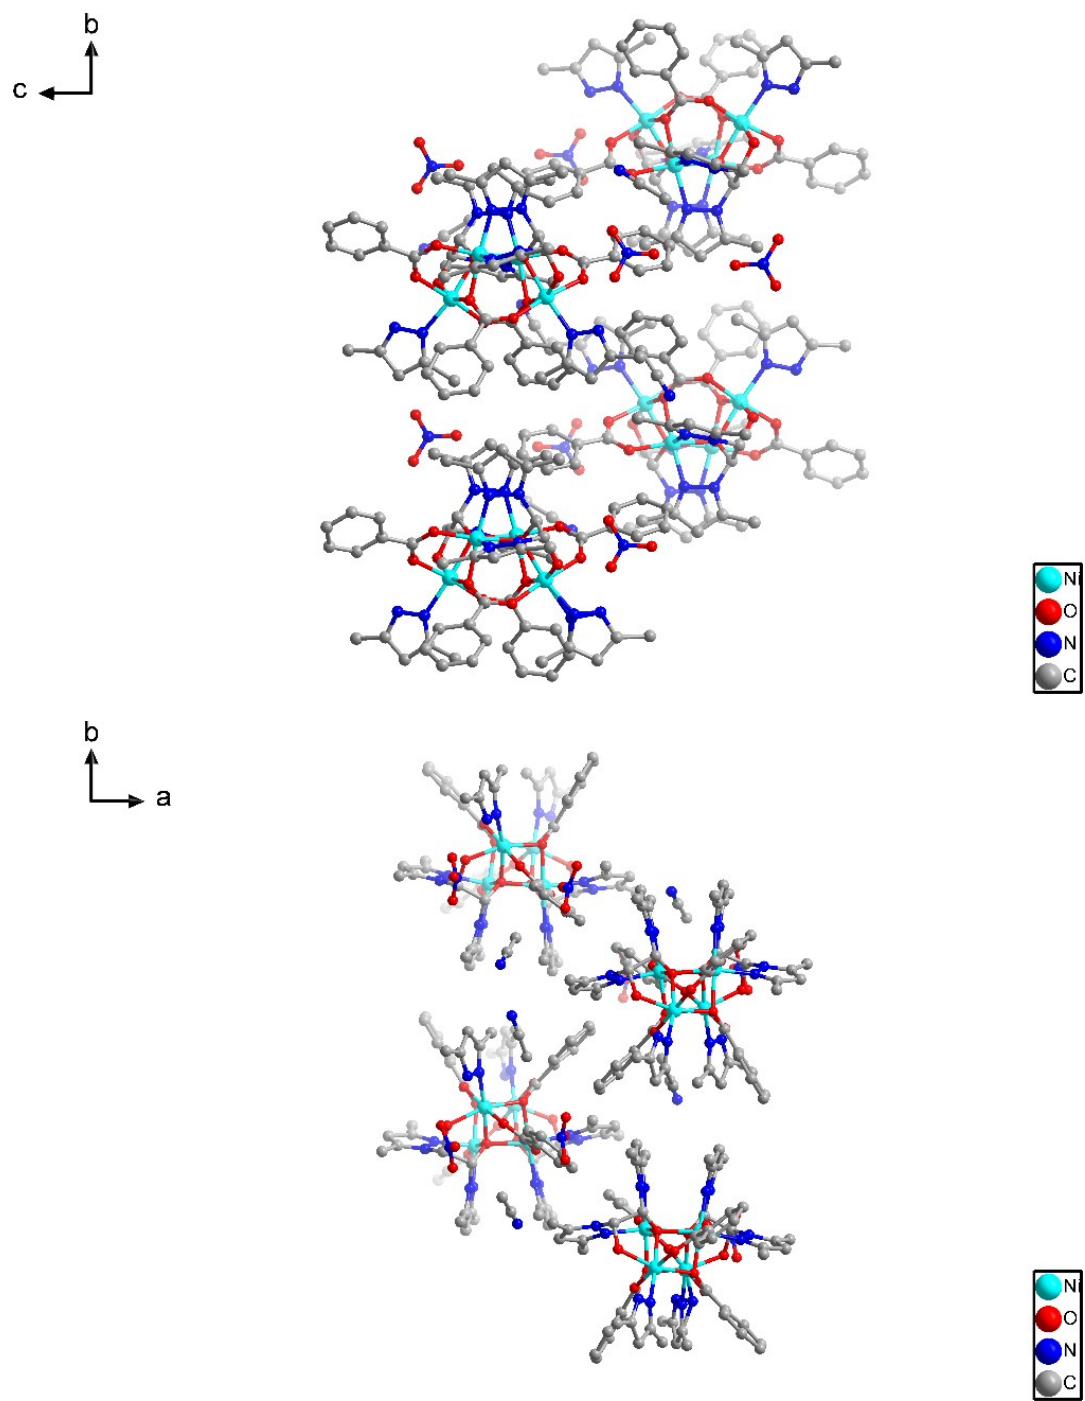

**Figure S9.** The cluster packing in the unit cell of **SD/Ni4a** viewed along two different directions.



## The details of fitting of magnetic data for three compounds

### SD/Ni4a:

The only successful fitting attempt was the one including ZFS and two exchange interactions. Some of the fitting attempts are shown in Figure 1 as red lines. The dashed, dotted and dash-dotted lines are attempts including only one  $J$  with a positive CF parameter, two  $J$ s with a positive CF parameter and one  $J$  with a negative CF parameter, respectively. All attempts failed to satisfactory fit the experimental data. Thus, the fit with two  $J$ s and a negative CF parameter was adopted (full red line). The fitting parameters with uncertainties are:

$$g = 2.2014 \pm 0.0004$$

$$J_1 = (5.86 \pm 0.02) \text{ cm}^{-1}$$

$$J_2 = (-2.570 \pm 0.008) \text{ cm}^{-1}$$

$$D = (-10.2 \pm 0.09) \text{ cm}^{-1}$$

### SD/Ni5a:

The green lines on Figure 1 show some of the fitting attempts for fitting the Ni5 experimental data. The dash-dotted line represents an attempt including only ZFS, which could not successfully fit the experimental data. In the case of Ni5 attempts with two  $J$ s gave satisfactory fit for a positive and a negative CF parameter. However, because of the similarities in the crystal structures between the Ni4 and Ni5 samples, the fit with a negative CF was adopted. Furthermore, the fitting parameters for the fit with a negative CF were closer to those in the Ni4 fit. A similarity between fitting parameters is expected due to the structural similarities between the samples. The fitting parameters with uncertainties are:

$$g = 2.1857 \pm 0.0008$$

$$J_1 = (6.53 \pm 0.02) \text{ cm}^{-1}$$

$$J_2 = (-0.0441 \pm 0.009) \text{ cm}^{-1}$$

$$D = (-11.1 \pm 0.3) \text{ cm}^{-1}$$

The  $J_2$  fitting parameter is negative even when its uncertainties are considered. The

correlation parameter between  $J_2$  and the CF parameter is calculated by the PHI software to be  $-0.9$  which indicates a strong correlation. However, attempts to omit one of the parameters or fixing its value to a different value to the one yielded by the fit, resulted in a worse quality of the fit. Based on these results and the small uncertainties of the individual parameters, it was concluded that the obtained values of the fitting parameters are valid and related to the properties of the investigated system.

#### SD/Ni6b:

The blue lines on Figure 1 show some fitting attempts for the Ni6 sample. The dash-dotted line shows the unsuccessful attempt including only exchange interactions without ZFS. Also other attempts, for example including only a positive CF (dashed line) or including a positive CF with one  $J$ , yielded fits which were not as good as the fit including ZFS only. Here are the fitting parameters of this fit including uncertainties:

$$g = 2.3497 \pm 0.0003$$

$$D = (-13.23 \pm 0.06) \text{ cm}^{-1}$$

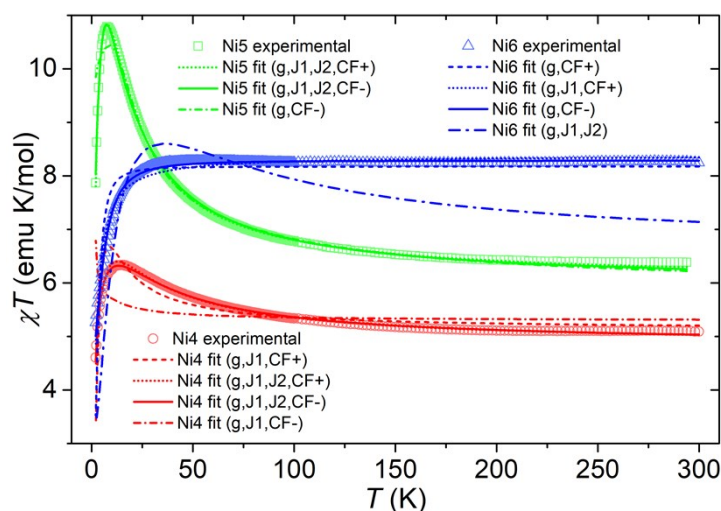

**Figure S10.** The product  $\chi T$  as a function of temperature. Comparison between the experimental data (circles, squares and triangles) and various fitting attempts (full, dashes, dotted and dash-dotted lines). The full lines represent the best fits obtained.
